# Supplementary material for: Making useful clinical guidelines: the ESGAR perspective
Source: Springer Nature journal article supplement (doi:10.1007/s00330-019-6002-9), 2019-02-07
Supplement: MOESM2 [file 16450058]

## Example search strategies:

**Guideline:** The first joint ESGAR/ ESPR consensus statement on the technical performance of cross-sectional small bowel and colonic imaging

**Guideline type:** Monodisciplinary, technical

**Reference:** Taylor et al Eur Radiol (2017) 27:2570-2582

### Search strategy used:

| Search details        | Time period: January 1983–December 2015                                                     |
|-----------------------|---------------------------------------------------------------------------------------------|
| <b>Medline search</b> |                                                                                             |
| 1                     | Crohn's disease                                                                             |
| 2                     | Crohn [tiab]                                                                                |
| 3                     | Inflammatory bowel disease                                                                  |
| 4                     | 1 OR 2 OR 3                                                                                 |
| 5                     | Computed tomography                                                                         |
| 6                     | CT [tiab]                                                                                   |
| 7                     | MRI                                                                                         |
| 8                     | "Magnetic resonance" [All fields] OR ("magnetic" [All fields] AND "resonance" [All fields]) |
| 9                     | Ultrasound                                                                                  |
| 10                    | 5 OR 6 OR 7 OR 8 OR 9                                                                       |
| 11                    | 4 AND 10                                                                                    |
| <b>Embase search</b>  |                                                                                             |
| 1                     | Crohn's disease.ab,ti,sh,kw                                                                 |
| 2                     | Inflammatory bowel disease.ab,ti,sh,kw                                                      |
| 3                     | 1 OR 2                                                                                      |
| 4                     | Computer Assisted Tomography.ab,ti,sh,kw                                                    |
| 5                     | Exp Computer Assisted Tomography/                                                           |

| Search details         | Time period: January 1983–December 2015        |
|------------------------|------------------------------------------------|
| 6                      | Nuclear magnetic resonance imaging.ab,ti,sh,kw |
| 7                      | Exp Nuclear magnetic resonance imaging/        |
| 8                      | Echography.ab,ti,sh,kw                         |
| 9                      | Exp echography/                                |
| 10                     | 4 OR 5 OR 6 OR 7 OR 8 OR 9                     |
| 11                     | 3 AND 10                                       |
| <b>Cochrane search</b> |                                                |
| 1                      | Crohn disease [Mesh]                           |
| 2                      | Inflammatory bowel disease [Mesh]              |
| 3                      | 1 OR 2                                         |
| 4                      | Diagnostic techniques and procedures [Mesh]    |
| 5                      | 3 AND 4                                        |

**Guideline:** Management and follow-up of gallbladder polyps

**Guideline type:** Multidisciplinary, ESGAR-led

**Reference:** Wiles et al Eur Radiol (2017) 27:3856-3866

**Search strategy used:**

MEDLINE and EMBASE databases were searched using search terms “gallbladder” and “polyp”, excluding case studies and limited to English language papers. Abstracts of all articles published between January 1995 and October 2015 were then reviewed.

|   |         |                                      |       |
|---|---------|--------------------------------------|-------|
| 1 | Medline | (“gall bladder*” OR gallbladder*).ti | 17699 |
| 2 | Medline | polyp*.ti                            | 60841 |
| 3 | Medline | 1 AND 2                              | 363   |
| 4 | Medline | 3 NOT “case report*”                 | 346   |
| 5 | Medline | 4 [Limit to: (Language English)]     | 250   |
| 6 | EMBASE  | 4 [Limit to: (Language English)]     | 248   |

|   |                    |                                                                                               |                                                          |
|---|--------------------|-----------------------------------------------------------------------------------------------|----------------------------------------------------------|
| 7 | Medline,<br>EMBASE | Duplicate filtered: [4 [Limit to: (Language English)]],<br>[4 [Limit to: (Language English)]] | 498<br><br>493 Unique results<br><br>5 Duplicate results |
|---|--------------------|-----------------------------------------------------------------------------------------------|----------------------------------------------------------|
