# Supplementary material for: Making useful clinical guidelines: the ESGAR perspective
Source: Eur Radiol. 2019 Feb 7;29(7):3757–60. doi: 10.1007/s00330-019-6002-9 (PMC6554243; doi:10.1007/s00330-019-6002-9)
Supplement: Supplementary file 3 — Example evidence summary tables (PDF 1115 kb) [file 330_2019_6002_MOESM3_ESM.pdf]

**Guideline:** Clinical indications for computed tomographic colonography: European Society of Gastrointestinal Endoscopy (ESGE) and European Society of Gastrointestinal and Abdominal Radiology (ESGAR) Guideline

**Reference:** Spada et al Eur Radiol (2015) 25:331-345

| Appendix e2 Computed tomographic colonoscopy (CTC): evidence tables                                                                                                                                                                                                                                                                               |                       |                        |             |            |                         |                 |                                              |                        |             |             |                             |                      |                 |                  |                   |                  |      |               |      |                       |       |                                 |      |                                            |                                                                                                                                              |
|---------------------------------------------------------------------------------------------------------------------------------------------------------------------------------------------------------------------------------------------------------------------------------------------------------------------------------------------------|-----------------------|------------------------|-------------|------------|-------------------------|-----------------|----------------------------------------------|------------------------|-------------|-------------|-----------------------------|----------------------|-----------------|------------------|-------------------|------------------|------|---------------|------|-----------------------|-------|---------------------------------|------|--------------------------------------------|----------------------------------------------------------------------------------------------------------------------------------------------|
| Table e1 Grading of studies comparing diagnostic yield of computed tomographic colonoscopy (CTC) after an incomplete colonoscopy.                                                                                                                                                                                                                 |                       |                        |             |            |                         |                 |                                              |                        |             |             |                             |                      |                 |                  |                   |                  |      |               |      |                       |       |                                 |      |                                            |                                                                                                                                              |
| Reference First author                                                                                                                                                                                                                                                                                                                            | GRADE characteristics |                        |             |            |                         | Participants, n | Examinations after incomplete colonoscopy, n | Single- or multicenter | Catharsis   | Tagging     | Reconstruct on interval, mm | Intravenous contrast | Type of CT      | Dose, mAs Supine | Reader experience | Reading strategy | CAD  | Polyps ≥10 mm |      | Polyps ≥6mm           |       | Advanced neoplasias/cancers     |      | Extracolonic findings (specify use E-RADS) | Comments                                                                                                                                     |
| Year                                                                                                                                                                                                                                                                                                                                              | Study design          | Study quality          | Consistency | Directness | Other modifying factors |                 |                                              |                        |             |             |                             |                      |                 |                  |                   |                  |      | n             | n    | n                     | n     | n                               | n    |                                            |                                                                                                                                              |
| Pullens [36] 2013                                                                                                                                                                                                                                                                                                                                 | Cohort                | No serious limitations | Good        | Good       | None                    | 136             | 136                                          | Single                 | Yes (41.2%) | Yes (58.8%) | 1                           | Yes                  | 16- or 64-slice | 100 mAs          | Expert            | n.a.             | No   | n.a.          | n.a. | 13 (additional yield) | n.a.  | 4 CRC (2.9%) (additional yield) | n.a. | 8 (5.9%)                                   | None                                                                                                                                         |
| Sassamone [37] 2011                                                                                                                                                                                                                                                                                                                               | Cohort                | No serious limitations | Good        | Good       | None                    | 68              | 68                                           | Single                 | Yes         | No          | 1                           | No                   | 16-slice        | 30 mAs           |                   |                  |      |               |      |                       |       |                                 |      |                                            |                                                                                                                                              |
| Neerincx [38] 2010                                                                                                                                                                                                                                                                                                                                | Cohort                | No serious limitations | Good        | Good       | None                    | 511             | 278                                          | Multi                  | n.a.        | n.a.        | n.a.                        | n.a.                 | n.a.            | n.a.             | n.a.              | n.a.             | n.a. | n.a.          | n.a. | n.a.                  | 1 CRC | n.a.                            | n.a. | Data reported on 14 patients               |                                                                                                                                              |
| Iafate 39] 2008                                                                                                                                                                                                                                                                                                                                   | Retrospective         | No serious limitations | Good        | Good       | None                    | 136             | 136                                          | Single                 | Yes         | Yes         | 1                           | Yes                  | 64-slice        | 50 mAs           | Expert            | Primary 2D       | No   | 9             | n.a. | n.a.                  | n.a.  | 4 CRC (2.9%) (additional yield) | 100% | 92 (67%)                                   | None                                                                                                                                         |
| Copel [40] 2007                                                                                                                                                                                                                                                                                                                                   | Prospective           | No serious limitations | Good        | Good       | None                    | 546             | 546                                          | Single                 | Yes         | No          | n.a.                        | Yes                  | 8-slice         | 100 mAs          |                   |                  |      |               |      |                       |       |                                 |      |                                            |                                                                                                                                              |
| Morfin [41] 1999                                                                                                                                                                                                                                                                                                                                  | Cohort                | No serious limitations | Good        | Good       | None                    | 40              | 40                                           | Single                 | Yes         | No          | 1.5                         | No                   | 1- or 4-slice   | 120 mAs          | n.a.              | Primary 2D       | No   | 0             | n.a. | 2                     | 50%   | 0                               | n.a. | 5 (13%)                                    | None                                                                                                                                         |
| Yucel [42] 2008                                                                                                                                                                                                                                                                                                                                   | Retrospective         | No serious limitations | Good        | Good       | None                    | 42              | 42                                           | Single                 | No          | Yes         | 1                           | No                   | 64-slice        | 150 mAs          | Expert            | Primary 3D       | No   | 12            | n.a. | 31                    | n.a.  | 1 CRC (additional yield)        | n.a. | 26 (62%)                                   | In 12 patients CTC was performed as first examination. Out of 22 patients with polyps at CTC, only 5 underwent colonoscopy for verification. |
| Macari [43] 1999                                                                                                                                                                                                                                                                                                                                  | Prospective           | No serious limitations | Good        | Good       | None                    | 20              | 20                                           | Single                 | No          | No          | 2.5                         | No                   | 1-slice         | 150 mAs          |                   |                  |      |               |      |                       |       |                                 |      |                                            |                                                                                                                                              |
| Neri [44] 2002                                                                                                                                                                                                                                                                                                                                    | Cohort                | No serious limitations | Good        | Good       | None                    | 34              | 34                                           | Single                 | Yes         | No          | 2                           | Yes                  | 1-slice         | 180 mAs          | Expert            | n.a.             | No   | 11            | 100% | 24                    | 86%   | 13 CRC (additional yield)       | 100% | 11 hepatic lesions                         | None                                                                                                                                         |
| Luo [45] 2002                                                                                                                                                                                                                                                                                                                                     | Cohort                | No serious limitations | Good        | Good       | None                    | 60              | 60                                           | Single                 | Yes         | No          | n.a.                        | No                   | 1-slice         | 100 mAs          | n.a.              | n.a.             | No   | 2             | n.a. | 10                    | n.a.  | 1 CRC (additional yield)        | 100% | n.a.                                       | None                                                                                                                                         |
| Lai [46] 2009                                                                                                                                                                                                                                                                                                                                     | Retrospective         | No serious limitations | Good        | Good       | None                    | 196             | 196                                          | Single                 | Yes         | No          | n.a.                        | No                   | 4-slice         | 100 mAs          |                   |                  |      |               |      |                       |       |                                 |      |                                            |                                                                                                                                              |
| CAD, computer-aided detection; CRC, colorectal cancer; CT, computed tomography; CTC, computed tomographic colonography; E-RADS, Extracolonic CT Colonography Reporting and Data System; GRADE, Grading of Recommendations Assessment Development and Evaluation; mAs, milliamperere seconds; n.a., not available; PPV, positive predictive value. |                       |                        |             |            |                         |                 |                                              |                        |             |             |                             |                      |                 |                  |                   |                  |      |               |      |                       |       |                                 |      |                                            |                                                                                                                                              |

### Evidence table for clinical question 5 (CTC after positive faecal occult blood test):

|                                                                                                                    | Appendix e2 Computed tomographic colonography (CTC): evidence tables                                                                                      |                                      |             |            |                                 |     |                                |                        |           |         |           |                             |                         |                   |                  |     |                                 |                    |                       |      |                                     |  |
|--------------------------------------------------------------------------------------------------------------------|-----------------------------------------------------------------------------------------------------------------------------------------------------------|--------------------------------------|-------------|------------|---------------------------------|-----|--------------------------------|------------------------|-----------|---------|-----------|-----------------------------|-------------------------|-------------------|------------------|-----|---------------------------------|--------------------|-----------------------|------|-------------------------------------|--|
|                                                                                                                    | Table e5 Computed tomographic colonography (CTC) performance in patients with positive fecal occult blood test (FOBT) or fecal immunochemical test (FIT). |                                      |             |            |                                 |     |                                |                        |           |         |           |                             |                         |                   |                  |     |                                 |                    |                       |      |                                     |  |
| First author                                                                                                       | GRADE study characteristics                                                                                                                               |                                      |             |            |                                 |     | FOBT/FIT-positive screeners, n | Single- or multicenter | Catharsis | Tagging | Dose, mAs | Reconstruction interval, mm | Intravenous contrast    | Reader experience | Reading strategy | CAD | Double reading                  | Reference standard | Cancers, n            |      | Per-patient 6-mm+ lesions or cancer |  |
| Year                                                                                                               | Design                                                                                                                                                    | Quality                              | Consistency | Directness | Other modifying factors         | CTC |                                |                        |           |         |           |                             |                         |                   |                  |     |                                 |                    | By reference standard | CTC  | By reference standard               |  |
| Heresbach [105] 2011                                                                                               | Cohort                                                                                                                                                    | No serious limitations               | Good        | Good       | None                            | 50  | Multicenter                    | Yes                    | Yes       | 50–75   | 1–1.25    | No                          | Minimum 50 cases        | Either            | No               | No  | Segmental unblinded colonoscopy | –                  | –                     | –    | –                                   |  |
| Liedenbaum [106] 2009                                                                                              | Cohort                                                                                                                                                    | No serious limitations               | Good        | Good       | None                            | 302 | Multicenter                    | No                     | Yes       | <50     | 0.9–1     | No                          | Minimum 100 cases       | Primary 2D        | No               | Yes | Segmental unblinded colonoscopy | 21                 | 22                    | 192  | 211                                 |  |
| Liedenbaum [107] 2009                                                                                              | Cohort                                                                                                                                                    | No serious limitations               | Good        | Good       | Same patients as reference [38] | 302 | Multicenter                    | No                     | Yes       | <50     | 0.9–1     | No                          | Minimum 100 cases       | Primary 2D        | No               | Yes | Segmental unblinded colonoscopy | n.a.               | n.a.                  | n.a. | n.a.                                |  |
| Regge [15] 2009                                                                                                    | Cohort                                                                                                                                                    | No serious limitations               | Good        | Good       | None                            | 221 | Multicenter                    | Yes                    | In 1/3    | <50     | 0.6–1.5   | No                          | Minimum 50 cases        | Either            | No               | No  | Segmental unblinded colonoscopy | –                  | –                     | 96   | 111                                 |  |
| Sai [108] 2010                                                                                                     | Cohort                                                                                                                                                    | Single center and single radiologist | Good        | Good       | None                            | 49  | Single-center                  | Yes                    | No        | 50      | 1         | No                          | Approximately 100 cases | Primary 2D        | No               | No  | Segmental unblinded colonoscopy | 2                  | 2                     | 21   | 22                                  |  |
| CAD, computer-aided detection; FIT, fecal immunochemical test; FOBT, fecal occult blood test; n.a., not available. |                                                                                                                                                           |                                      |             |            |                                 |     |                                |                        |           |         |           |                             |                         |                   |                  |     |                                 |                    |                       |      |                                     |  |
